# Supplementary material for: Genome-Wide Identification and Expression Analysis of AMT and NRT Gene Family in Pecan (Carya illinoinensis) Seedlings Revealed a Preference for NH4+-N
Source: Int J Mol Sci. 2022 Nov 1;23(21):13314. doi: 10.3390/ijms232113314 (PMC9655437; doi:10.3390/ijms232113314)
Supplement: Supplementary file 1 [file ijms-23-13314-s001.zip › Supplementary table.xlsx]

## Sheet: Table S1
Table S1. Composition of the nutrient solution under different NH4+:NO3- ratio treatments.
Nutrient	Treatment
Source	CK	T1	T2	T3	T4	T5
Ca（H2PO4）2（mM）	0.5	0.5	0.5	0.5	0.5	0.5
K2SO4（mM）	1	1	1	1	1	1
MgSO4（mM）	0.5	0.5	0.5	0.5	0.5	0.5
ZnSO4（μM）	1	1	1	1	1	1
H3BO3（μM）	12.5	12.5	12.5	12.5	12.5	12.5
MnSO4（μM）	1	1	1	1	1	1
CuSO4（μM）	0.25	0.25	0.25	0.25	0.25	0.25
EDTA-Fe（μM）	10	10	10	10	10	10
DCD（μM）	7	7	7	7	7	7
（Na）6Mo7O24（μM）	0.1	0.1	0.1	0.1	0.1	0.1
CaCl2（mM）	1.25	1.25	1.25	1.25	1.25	1.25
（NH4）2SO4（mM）	0	0	0.25	0.5	0.75	1
Ca（NO3）2（mM）	0	1	0.75	0.5	0.25	0

## Sheet: Table S2
Table S2. Specific primers of AMT and NRT genes for qRT-PCR analysis.
No.	Gene Name	Gene ID	Forward Primer Sequence（5´-3´）	Reverse Primer Sequence（5´-3´）
1	CiAMT1.1	CiPaw.01G175500	AATCATCTGCGGGTTCGTGT	TCCAACGGGTCGTCGAATTT
2	CiAMT1.3a	CiPaw.13G078400	TGGACTGCTGTGGGAAGAAC	TGCAACAAACCCACCTAGCA
3	CiAMT1.3b	CiPaw.13G078300	TTCGGCGTATCTCGTCTTCG	CAGCAAAGAACCCACACACG
4	CiAMT1.4	CiPaw.03G272300	ACTTCTTCGGCCTTGGGATG	ACGCGATAAATTGGGTCCGT
5	CiAMT2.1	CiPaw.09G212800	TCTTTGGGGTGGTGGCTTTT	CCTCGGGCCAACCCAATAAG
6	CiAMT2.2	CiPaw.10G159100	GCGGTGGGTTTCTGTACCAC	GCCTCGGGCCAACCCAATA
7	CiAMT3.1a	CiPaw.03G114700	AGCAGCCCTAAGCGAATCTG	CAACGCCTTTACCGCTTGAA
8	CiAMT3.1b	CiPaw.04G077000	TTGTGGGGTGGAGGGTTCT	TCTTGATCTTGGTCCTACCCAGT
9	CiAMT3.1c	CiPaw.10G101600	GTTATCCACACCCATGCCGT	GCAGCAAAACTGCAAGGAAA
10	CiAMT3.3	CiPaw.09G212700	AGCAGCTTTCTGGGTTGGTC	AAAGAATTCCAGCCCCAGCA
11	CiNPF1.2a	CiPaw.01G234900	ATAGCCAGCTTCCTGGGGA	TGATTGGTCACATGGGGGAG
12	CiNPF2.11b	CiPaw.11G037000	GCACAGGTCATAGTGGTTGC	GGCTTTGTCCAGGAATCTGAA
13	CiNPF2.13	CiPaw.05G140700	GGTTGGTGCCTTCATCTCTGA	TCACAGTCACCATTCCCAGAAG
14	CiNPF2.4	CiPaw.13G117800	AGCCTTCTTCATTCCCGGTT	GCATACCACAACACCTTGGAGA
15	CiNPF2.7b	CiPaw.13G105400	ACCAACTTAATCGCCACGA	TGCACGGTTGAGAAACCTGA
16	CiNPF4.6	CiPaw.05G140000	CCGCTTCTTTTGTATTGGTGGT	GCCGATTTGGTGGGAGAGAA
17	CiNPF5.10b	CiPaw.07G236200	ATGCCCATACTCCGCTTGTG	CCGCGACTTCCACACCGAT
18	CiNPF5.5	CiPaw.10G155000	CTTGCTTTCAGCTTTGGGATG	CCAGGAAAGAAGCCACGGATA
19	CiNPF5.9a	CiPaw.03G033600	CACCCCTTGCGGACTCTTAC	AATGCCACAAGCCCCACAAC
20	CiNPF6.2	CiPaw.03G243500	ACAAGCTCTGGGCACTGG	TTGGAACCCGTTGGCTTGT
21	CiNPF6.3a	CiPaw.11G151700	CGTCCTTGTTGTTCAGCGTT	GCCTTGTCCAAGAAACGGAAC
22	CiNPF6.4	CiPaw.03G156400	CATTACTGCTGTGGGGGTGA	TGTAGTTGTCGCATGGAGGG
23	CiNPF7.2	CiPaw.14G014300	TCCACACTCAAGGCTTCAAATTC	TTGGAAGCAGTCTTAGAACACA
24	CiNPF7.3a	CiPaw.11G089900	CCCAACTCCTTCCTCTTCTTTG	GCCCTTCTTTGGATTTAACCTCCTT
25	CiNRT2.5	CiPaw.05G187600	CTTGGGCAGGTTGGGACTTT	TACGACCCCCAGTGACCTAC
26	CiNRT2.7	CiPaw.04G027400	TCCCTTTGTTTCCAAGAGGTCG	CCCCATGAGAGAGATGCCTG

## Sheet: Table S3
Table S3. The identification and sequence analysis of the AMT and NRT gene family in pecan.
Gene Name	Gene ID	Exon No.	AA	CDS（bp）	MW（kDa）	pI	Instability Index	GRAVY	TMHs	Subcellular Localization
CiAMT1.1	CiPaw.01G175500	1	497	1494	53347.2	7.14	25.66	0.375	9	Cell membrane.
CiAMT1.3a	CiPaw.13G078400	1	367	1104	39407.4	5.47	18.06	0.663	7	Cell membrane. Vacuole.
CiAMT1.3b	CiPaw.13G078300	1	465	1398	50173.4	4.97	24.61	0.538	9	Cell membrane.
CiAMT1.4	CiPaw.03G272300	1	499	1500	53370.3	6.36	21.5	0.451	9	Cell membrane.
CiAMT2.1	CiPaw.09G212800	4	487	1464	52389.2	6.45	36.62	0.474	11	Cell membrane.
CiAMT2.2	CiPaw.10G159100	5	488	1467	52585.4	7.07	32.99	0.469	11	Cell membrane.
CiAMT3.1a	CiPaw.03G114700	3	513	1542	55456.1	7.64	33.89	0.508	11	Cell membrane.
CiAMT3.1b	CiPaw.04G077000	3	458	1377	49526	8.13	37.25	0.498	11	Cell membrane.
CiAMT3.1c	CiPaw.10G101600	1	156	471	17236.4	5.89	51.71	0.454	0	Chloroplast. Mitochondrion.
CiAMT3.3	CiPaw.09G212700	3	480	1443	51723.5	8.68	31	0.484	11	Cell membrane.
CiNPF1.2a/CiNRT1.11a	CiPaw.01G234900	4	578	1737	63766.6	9.04	44.45	0.356	9	Vacuole.
CiNPF1.2b/CiNRT1.11b	CiPaw.08G025100	4	575	1728	63074.8	6.94	43.57	0.405	11	Vacuole.
CiNPF2.4	CiPaw.13G117800	3	533	1602	58148.6	9.26	40.37	0.32	11	Cell membrane.
CiNPF2.7a	CiPaw.14G076700	4	565	1698	61975.1	8.71	37.25	0.373	10	Vacuole.
CiNPF2.7b	CiPaw.13G105400	4	555	1668	60377.1	8.87	38.85	0.358	10	Vacuole.
CiNPF2.7c	CiPaw.01G277300	4	558	1677	61665	9.19	39.43	0.389	12	Vacuole.
CiNPF2.7d	CiPaw.01G277100	4	571	1716	62792.3	9.11	37.65	0.39	12	Vacuole.
CiNPF2.8a	CiPaw.09G200000	3	626	1881	70077.6	8.42	39.7	0.161	10	Vacuole.
CiNPF2.8b	CiPaw.11G037200	4	546	1641	60822.2	9.35	38.92	0.258	9	Vacuole.
CiNPF2.11a/CiNRT1.10a	CiPaw.11G037100	4	586	1761	65316.6	9.22	35.44	0.319	11	Vacuole.
CiNPF2.11b/CiNRT1.10b	CiPaw.11G037000	4	595	1788	65434.5	9.43	32.57	0.277	11	Cell membrane. Vacuole.
CiNPF2.13/CiNRT1.7	CiPaw.05G140700	4	635	1908	70657.7	8.71	35.24	0.14	12	Vacuole.
CiNPF3.1a	CiPaw.15G083900	2	485	1458	54278.5	9.21	32.03	0.245	7	Vacuole.
CiNPF3.1b	CiPaw.01G170600	4	611	1836	68559.6	8.85	43.38	0.065	9	Vacuole.
CiNPF4.3a	CiPaw.05G001500	5	616	1851	67978.7	8.88	39.43	0.282	12	Cell membrane. Vacuole.
CiNPF4.3b	CiPaw.06G176600	5	615	1848	68320.3	8.85	40.4	0.28	12	Vacuole.
CiNPF4.4	CiPaw.03G012000	5	624	1875	68709.1	9.03	43.95	0.306	11	Vacuole.
CiNPF4.5a	CiPaw.13G147800	6	561	1686	61779.7	6.39	37.35	0.158	5	Vacuole.
CiNPF4.5b	CiPaw.15G065900	5	591	1776	65419.6	8.47	32.75	0.399	12	Vacuole.
CiNPF4.5c	CiPaw.10G098900	4	521	1566	57273.9	6.76	35.97	0.37	11	Vacuole.
CiNPF4.5d	CiPaw.01G126900	6	517	1554	58402.3	8.59	33.42	0.345	10	Vacuole.
CiNPF4.5e	CiPaw.02G108500	9	531	1596	59408	6.99	37.58	0.246	9	Vacuole.
CiNPF4.6/CiNRT1.2	CiPaw.05G140000	5	587	1764	64277.9	8.8	47.25	0.365	12	Vacuole.
CiNPF4.7	CiPaw.12G016400	5	586	1761	64992	8.4	43.1	0.311	12	Vacuole.
CiNPF5.1a	CiPaw.01G304100	5	565	1698	6299.25	9.45	34.57	0.207	10	Vacuole.
CiNPF5.1b	CiPaw.02G197700	4	585	1758	65365.2	9.29	34.94	0.242	10	Vacuole.
CiNPF5.2a/CiPawPTR3a	CiPaw.01G180500	4	606	1821	67620.9	9.1	35.17	0.221	10	Vacuole.
CiNPF5.2b/CiPawPTR3b	CiPaw.02G108400	5	423	1272	47059.7	9.25	30.95	0.168	6	Vacuole.
CiNPF5.2c/CiPawPTR3c	CiPaw.03G268600	4	592	1779	66454.6	9.12	30.44	0.255	12	Vacuole.
CiNPF5.2d/CiPawPTR3d	CiPaw.16G050800	4	592	1779	66626	9.38	30.79	0.267	12	Vacuole.
CiNPF5.4a	CiPaw.13G013300	5	582	1749	64738.3	9.05	28.81	0.316	10	Vacuole.
CiNPF5.4b	CiPaw.13G169900	3	484	1455	53553.9	9.24	37.43	0.354	9	Vacuole.
CiNPF5.4c	CiPaw.14G007400	5	581	1746	64540.9	8.39	33.27	0.374	11	Vacuole.
CiNPF5.5	CiPaw.10G155000	5	673	2022	74726.1	8.85	33.69	0.27	8	Cell membrane. Vacuole.
CiNPF5.6a	CiPaw.01G292800	4	591	1776	65957.3	8.93	38.29	0.301	10	Vacuole.
CiNPF5.6b	CiPaw.09G200800	3	517	1554	57705.9	9.03	37.22	0.358	10	Vacuole.
CiNPF5.6c	CiPaw.09G200900	4	606	1821	67559.2	9.03	37.24	0.267	10	Vacuole.
CiNPF5.6d	CiPaw.09G201100	4	585	1758	65262.5	9.2	34.08	0.268	10	Vacuole.
CiNPF5.6e	CiPaw.10G149100	4	584	1755	65754.1	9.29	39.45	0.238	10	Vacuole.
CiNPF5.9a	CiPaw.03G033600	4	553	1662	62145.9	8.11	44.97	0.279	10	Vacuole.
CiNPF5.9b	CiPaw.04G022100	4	553	1662	62060.4	8.34	44.26	0.243	10	Vacuole.
CiNPF5.10a	CiPaw.07G236100	3	350	1053	38634.2	9.3	44.48	0.395	6	Cell membrane. Vacuole.
CiNPF5.10b	CiPaw.07G236200	4	585	1758	64384.6	5.89	37.05	0.404	8	Vacuole.
CiNPF5.10c	CiPaw.08G002600	4	569	1710	61920.9	7.95	42.9	0.466	12	Vacuole.
CiNPF6.1	CiPaw.05G100300	5	618	1857	67833.8	9.04	34.67	0.256	10	Cell membrane. Vacuole.
CiNPF6.2	CiPaw.03G243500	5	584	1755	63842.4	8.85	26.06	0.365	11	Vacuole.
CiNPF6.3a/CiNRT1.1a	CiPaw.11G151700	5	596	1791	65809	9.24	38.03	0.316	11	Vacuole.
CiNPF6.3a/CiNRT1.1b	CiPaw.12G108100	5	596	1791	65677.5	7.07	31.21	0.344	12	Vacuole.
CiNPF6.4/CiNRT1.3	CiPaw.03G156400	5	594	1785	65436.6	9.25	27	0.307	12	Vacuole.
CiNPF7.1a	CiPaw.13G013400	2	446	1341	49017.7	7.54	32.7	0.201	6	Vacuole.
CiNPF7.1b	CiPaw.14G129200	5	611	1836	66581.3	7.04	26.35	0.282	11	Vacuole.
CiNPF7.2/CiNRT1.8	CiPaw.14G014300	5	606	1821	66952.5	6.71	27.96	0.245	12	Vacuole.
CiNPF7.3a/CiNRT1.5a	CiPaw.11G089900	5	597	1794	66230	8.42	31.13	0.25	10	Vacuole.
CiNPF7.3b/CiNRT1.5b	CiPaw.12G061500	5	606	1821	66840.4	7.03	28.86	0.27	12	Cell membrane. Vacuole.
CiNPF7.3c/CiNRT1.5c	CiPaw.13G020300	5	604	1815	66778.5	8.2	27.64	0.278	12	Cell membrane. Vacuole.
CiNPF7.3d/CiNRT1.5d	CiPaw.14G014200	5	597	1794	66180.6	7.06	31.13	0.268	12	Vacuole.
CiNPF8.1	CiPaw.09G206500	8	941	2826	106242	8.91	35.03	0.182	16	Cell membrane. Vacuole.
CiNPF8.2a/CiPawPTR5a	CiPaw.14G079400	5	500	1503	55709.8	8.94	24.66	0.258	8	Vacuole.
CiNPF8.2b/CiPawPTR5b	CiPaw.07G155200	4	571	1716	63771.8	8.71	25.21	0.17	10	Vacuole.
CiNPF8.2c/CiPawPTR5c	CiPaw.14G062000	8	487	1464	54636.3	8.57	36.94	0.184	9	Vacuole.
CiNPF8.3a/CiPawPTR2a	CiPaw.05G160700	5	584	1755	64549.2	5.36	34.57	0.221	10	Vacuole.
CiNPF8.3b/CiPawPTR2b	CiPaw.05G160800	5	595	1788	66087.4	5.4	33.83	0.264	10	Cell membrane. Vacuole.
CiNPF8.3c/CiPawPTR2c	CiPaw.05G160900	5	583	1752	64770.2	6.62	30.97	0.291	10	Vacuole.
CiNPF8.3d/CiPawPTR2d	CiPaw.05G171700	5	584	1755	64579.6	5.56	34.25	0.255	10	Vacuole.
CiNRT2.1	CiPaw.14G086400	3	530	1593	57789.3	9.21	42.21	0.385	11	Cell membrane.
CiNRT2.5	CiPaw.05G187600	2	501	1506	54300.9	8.7	38.82	0.417	10	Cell membrane.
CiNRT2.7	CiPaw.04G027400	3	452	1359	49234.1	9.13	38.76	0.559	10	Cell membrane.
CiNRT3.1	CiPaw.11G018800	2	206	621	22726.2	9.37	23.1	0.066	2	Nucleus.
CiNRT3.2	CiPaw.12G032000	3	194	585	21519.8	9.36	31.62	0.001	2	Cell membrane. Cell wall. Chloroplast. Peroxisome. Vacuole.

## Sheet: Table S4
Table S4. The conservative domain annotation of pecan AMTs and NRTs.
Gene Name	Gene ID	Alignment start	Alignment end	Envelope start	Envelope end	HMM acc	HMM name	HMM start	HMM end	HMM length	Bit score	E-value
CiAMT1.1	CiPaw.01G175500	48	469	46	469	PF00909.23	Ammonium_transp	3	399	399	460.13	5.3e-138
CiAMT1.3a	CiPaw.13G078400	17	362	15	367	PF00909.23	Ammonium_transp	2	329	399	381.42	4.2e-114
CiAMT1.3b	CiPaw.13G078300	19	443	16	443	PF00909.23	Ammonium_transp	3	399	399	435.18	2e-130
CiAMT1.4	CiPaw.03G272300	52	474	50	474	PF00909.23	Ammonium_transp	3	399	399	443.23	7.2e-133
CiAMT2.1	CiPaw.09G212800	24	446	24	446	PF00909.23	Ammonium_transp	1	399	399	267.85	1.3e-79
CiAMT2.2	CiPaw.10G159100	25	446	24	446	PF00909.23	Ammonium_transp	2	399	399	264.52	1.4e-78
CiAMT3.1a	CiPaw.03G114700	55	478	54	478	PF00909.23	Ammonium_transp	2	399	399	272.33	5.7e-81
CiAMT3.1b	CiPaw.04G077000	1	423	1	423	PF00909.23	Ammonium_transp	4	399	399	273.17	3.2e-81
CiAMT3.1c	CiPaw.10G101600	85	151	81	155	PF00909.23	Ammonium_transp	289	352	399	28.86	5e-07
CiAMT3.3	CiPaw.09G212700	29	451	29	451	PF00909.23	Ammonium_transp	1	399	399	270.48	2.1e-80
CiNPF1.2a	CiPaw.01G234900	97	530	97	530	PF00854.24	PTR2	1	397	397	287.59	1.5e-85
CiNPF1.2b	CiPaw.08G025100	91	523	91	523	PF00854.24	PTR2	1	397	397	253.02	4.6e-75
CiNPF1.2b	CiPaw.08G025100	39	503	30	504	PF07690.19	MFS_1	11	352	353	38.6	6.4e-10
CiNPF2.11a	CiPaw.11G037100	90	520	89	528	PF00854.24	PTR2	2	389	397	280.84	1.6e-83
CiNPF2.11b	CiPaw.11G037000	99	532	96	536	PF00854.24	PTR2	4	393	397	263.84	2.4e-78
CiNPF2.13	CiPaw.05G140700	131	561	130	566	PF00854.24	PTR2	2	392	397	279.97	3e-83
CiNPF2.4	CiPaw.13G117800	69	425	68	427	PF07690.19	MFS_1	2	351	353	73.14	2e-20
CiNPF2.7a	CiPaw.14G076700	92	507	87	514	PF00854.24	PTR2	6	388	397	232.21	9.7e-69
CiNPF2.7b	CiPaw.13G105400	84	493	79	501	PF00854.24	PTR2	6	388	397	247.1	2.9e-73
CiNPF2.7c	CiPaw.01G277300	95	513	93	521	PF00854.24	PTR2	3	388	397	225.22	1.3e-66
CiNPF2.7d	CiPaw.01G277100	96	513	93	521	PF00854.24	PTR2	4	388	397	229.36	7.1e-68
CiNPF2.8a	CiPaw.09G200000	132	562	130	562	PF00854.24	PTR2	3	397	397	238.97	8.6e-71
CiNPF2.8b	CiPaw.11G037200	103	534	103	534	PF00854.24	PTR2	1	397	397	258.9	7.6e-77
CiNPF3.1a	CiPaw.15G083900	1	424	1	425	PF00854.24	PTR2	15	396	397	321.98	5.3e-96
CiNPF3.1b	CiPaw.01G170600	104	536	104	536	PF00854.24	PTR2	1	397	397	312.44	4.2e-93
CiNPF4.3a	CiPaw.05G001500	95	526	95	535	PF00854.24	PTR2	1	390	397	308.04	9e-92
CiNPF4.3b	CiPaw.06G176600	98	530	98	531	PF00854.24	PTR2	1	396	397	314.23	1.2e-93
CiNPF4.4	CiPaw.03G012000	112	546	112	547	PF00854.24	PTR2	1	396	397	319.39	3.2e-95
CiNPF4.5a	CiPaw.13G147800	304	561	288	561	PF00854.24	PTR2	24	267	397	171.03	3.7e-50
CiNPF4.5a	CiPaw.13G147800	15	124	13	125	PF02391.20	MoaE	3	112	113	130.65	3e-38
CiNPF4.5b	CiPaw.15G065900	101	531	101	540	PF00854.24	PTR2	1	388	397	316.33	2.7e-94
CiNPF4.5c	CiPaw.10G098900	35	464	35	471	PF00854.24	PTR2	1	389	397	288.87	6e-86
CiNPF4.5d	CiPaw.01G126900	46	445	45	450	PF00854.24	PTR2	2	392	397	243.83	2.9e-72
CiNPF4.5e	CiPaw.02G108500	99	526	99	526	PF00854.24	PTR2	1	397	397	350.59	1.1e-104
CiNPF4.6	CiPaw.05G140000	101	542	97	543	PF00854.24	PTR2	5	396	397	358.67	3.8e-107
CiNPF4.7	CiPaw.12G016400	107	540	106	542	PF00854.24	PTR2	2	395	397	367.48	8e-110
CiNPF5.10a	CiPaw.07G236100	120	541	120	543	PF00854.24	PTR2	1	395	397	313.55	1.9e-93
CiNPF5.10b	CiPaw.07G236200	25	298	19	307	PF00854.24	PTR2	129	389	397	177	5.7e-52
CiNPF5.10c	CiPaw.08G002600	103	526	103	527	PF00854.24	PTR2	1	396	397	330.67	1.2e-98
CiNPF5.10c	CiPaw.08G002600	47	507	41	508	PF07690.19	MFS_1	7	352	353	35.25	6.7e-09
CiNPF5.1a	CiPaw.01G304100	97	523	97	523	PF00854.24	PTR2	1	397	397	357.55	8.3e-107
CiNPF5.1b	CiPaw.02G197700	95	521	95	521	PF00854.24	PTR2	1	397	397	362.67	2.3e-108
CiNPF5.2a	CiPaw.01G180500	101	403	101	409	PF00854.24	PTR2	1	278	397	260.76	2.1e-77
CiNPF5.2b	CiPaw.02G108400	99	526	99	526	PF00854.24	PTR2	1	397	397	352.05	3.9e-105
CiNPF5.2c	CiPaw.03G268600	106	536	106	536	PF00854.24	PTR2	1	397	397	368.25	4.7e-110
CiNPF5.2d	CiPaw.16G050800	97	375	97	376	PF00854.24	PTR2	1	259	397	184.11	3.9e-54
CiNPF5.2d	CiPaw.16G050800	375	479	370	488	PF00854.24	PTR2	284	388	397	55.05	6.1e-15
CiNPF5.4a	CiPaw.13G013300	101	516	101	522	PF00854.24	PTR2	1	390	397	309.49	3.3e-92
CiNPF5.4a	CiPaw.13G013300	47	502	37	504	PF07690.19	MFS_1	9	351	353	45.42	5.4e-12
CiNPF5.4b	CiPaw.13G169900	7	380	1	380	PF00854.24	PTR2	35	397	397	285.96	4.6e-85
CiNPF5.4c	CiPaw.14G007400	100	517	100	523	PF00854.24	PTR2	1	390	397	296.09	3.9e-88
CiNPF5.4c	CiPaw.14G007400	42	503	38	505	PF07690.19	MFS_1	5	351	353	43.55	2e-11
CiNPF5.5	CiPaw.10G155000	97	451	93	466	PF00854.24	PTR2	5	337	397	104.01	8.3e-30
CiNPF5.6a	CiPaw.01G292800	113	533	112	542	PF00854.24	PTR2	2	390	397	310.21	2e-92
CiNPF5.6b	CiPaw.09G200800	111	527	111	537	PF00854.24	PTR2	1	389	397	305.29	6.2e-91
CiNPF5.6b	CiPaw.09G200800	93	514	59	523	PF07690.19	MFS_1	45	351	353	39.61	3.2e-10
CiNPF5.6c	CiPaw.09G200900	38	452	37	462	PF00854.24	PTR2	2	388	397	305.67	4.7e-91
CiNPF5.6c	CiPaw.09G200900	20	440	11	449	PF07690.19	MFS_1	46	351	353	39.92	2.6e-10
CiNPF5.6d	CiPaw.09G201100	112	527	111	536	PF00854.24	PTR2	2	389	397	295.9	4.4e-88
CiNPF5.6d	CiPaw.09G201100	97	514	94	523	PF07690.19	MFS_1	49	351	353	40.08	2.3e-10
CiNPF5.6e	CiPaw.10G149100	106	523	106	530	PF00854.24	PTR2	1	391	397	299.99	2.5e-89
CiNPF5.9a	CiPaw.03G033600	81	502	80	507	PF00854.24	PTR2	2	392	397	268.61	8.5e-80
CiNPF5.9b	CiPaw.04G022100	81	506	81	507	PF00854.24	PTR2	1	396	397	274.6	1.3e-81
CiNPF6.1	CiPaw.05G100300	140	570	140	580	PF00854.24	PTR2	1	389	397	269.85	3.6e-80
CiNPF6.2	CiPaw.03G243500	92	519	92	520	PF00854.24	PTR2	1	396	397	353.33	1.6e-105
CiNPF6.3a	CiPaw.11G151700	100	538	100	539	PF00854.24	PTR2	1	396	397	399.56	1.5e-119
CiNPF6.3b	CiPaw.12G108100	100	535	100	541	PF00854.24	PTR2	1	394	397	402.04	2.6e-120
CiNPF6.4	CiPaw.03G156400	103	515	102	525	PF00854.24	PTR2	2	389	397	362.91	2e-108
CiNPF7.1a	CiPaw.13G013400	22	431	16	436	PF00854.24	PTR2	13	391	397	289.6	3.6e-86
CiNPF7.1b	CiPaw.14G129200	125	549	124	549	PF00854.24	PTR2	2	397	397	315.47	5e-94
CiNPF7.2	CiPaw.14G014300	113	540	113	548	PF00854.24	PTR2	1	389	397	325.19	5.6e-97
CiNPF7.3a	CiPaw.11G089900	108	536	108	543	PF00854.24	PTR2	1	390	397	313.63	1.8e-93
CiNPF7.3b	CiPaw.12G061500	108	536	108	543	PF00854.24	PTR2	1	390	397	310.84	1.3e-92
CiNPF7.3c	CiPaw.13G020300	117	540	113	547	PF00854.24	PTR2	5	390	397	328.8	4.5e-98
CiNPF7.3c	CiPaw.13G020300	53	524	51	528	PF07690.19	MFS_1	3	349	353	34.05	1.6e-08
CiNPF7.3d	CiPaw.14G014200	113	541	113	548	PF00854.24	PTR2	1	390	397	327.52	1.1e-97
CiNPF8.1	CiPaw.09G206500	1	280	1	280	PF00854.24	PTR2	115	397	397	106.35	1.6e-30
CiNPF8.1	CiPaw.09G206500	469	897	469	897	PF00854.24	PTR2	1	397	397	432.68	1.3e-129
CiNPF8.2a	CiPaw.14G079400	119	456	118	456	PF00854.24	PTR2	82	397	397	297.53	1.4e-88
CiNPF8.2b	CiPaw.07G155200	45	234	45	250	PF00854.24	PTR2	1	181	397	113.99	7.7e-33
CiNPF8.2b	CiPaw.07G155200	280	422	272	424	PF00854.24	PTR2	248	395	397	98.28	4.6e-28
CiNPF8.2c	CiPaw.14G062000	97	527	97	527	PF00854.24	PTR2	1	397	397	443.86	5.1e-133
CiNPF8.2c	CiPaw.14G062000	44	506	35	508	PF07690.19	MFS_1	10	351	353	46.1	3.4e-12
CiNPF8.3a	CiPaw.05G160700	113	544	113	544	PF00854.24	PTR2	1	397	397	464.55	2.6e-139
CiNPF8.3b	CiPaw.05G160800	113	544	113	544	PF00854.24	PTR2	1	397	397	468.43	1.8e-140
CiNPF8.3c	CiPaw.05G160900	124	555	124	555	PF00854.24	PTR2	1	397	397	465.64	1.2e-139
CiNPF8.3d	CiPaw.05G171700	112	543	112	543	PF00854.24	PTR2	1	397	397	422.89	1.2e-126
CiNPF8.3d	CiPaw.05G171700	55	520	50	528	PF07690.19	MFS_1	6	349	353	35.99	4e-09
CiNRT2.1	CiPaw.14G086400	69	425	68	427	PF07690.19	MFS_1	2	351	353	72.67	2.8e-20
CiNRT2.5	CiPaw.05G187600	40	396	39	398	PF07690.19	MFS_1	2	351	353	64.28	1e-17
CiNRT2.7	CiPaw.04G027400	44	154	43	157	PF07690.19	MFS_1	2	114	353	34.5	1.1e-08
CiNRT2.7	CiPaw.04G027400	148	378	145	380	PF07690.19	MFS_1	125	351	353	43.65	1.9e-11
CiNRT3.1	CiPaw.11G018800	28	172	28	172	PF16974.8	NAR2	1	143	143	208.5	3.1e-62
CiNRT3.2	CiPaw.12G032000	29	157	29	157	PF16974.8	NAR2	1	143	143	101	4.5e-29

## Sheet: Table S5
Table S5. Motif sequences of pecan AMTs and NRTs.
Gene Family	Motifs	Sequences
AMT	Motif1	FLFHWGVIDYSGGYVVHLSSGIAGFTAAYWVGPR
	Motif2	DVLFFGKPSVIGAVQGMJTGLVCITPGAGLVZPWAAIVMGF
	Motif3	DRERFPPNNVLLVLAGAGLLWMGWYGFNGGS
	Motif4	DDTLGVFHTHAVAGLLGGILTGLFAEPEL
	Motif5	VGFQSQPGLVILYAGIVKKKWAVNSAFMA
	Motif6	WNLVVTTIILLVIRLFIPLRMPEEELAIGDDAVHGEEAYALWGDGE
	Motif7	DATFVLFQWAFAAITAIJLAGSILERMNIKAWMIF
	Motif8	ICWVLWGYKMSFGHKLLPFWGKGGPALGQKFLIEQAKLPET
	Motif9	PYAANIDSSMAVLNTNICAATSLLVWTSL
	Motif10	GSGPWVAMMRTHKTSTLLQSV
NRT	Motif1	WLVPQYVLLGIAEVFTYVGQLEFFYDZAPDGMRSLGTALFL
	Motif2	NPWRLCTVTQVEELKIVJRMJPIWLTTII
	Motif3	YLIALGTGGIKPCVSTFGADQFDEDDPKE
	Motif4	GITELQRIGIGLVLSIJAMVVAALVEKKR
	Motif5	NLVTYLTRVLHQDNATAANNVTNWSGTVYLLPLLGAFJADSYLGRYWTIL
	Motif6	LNKGHLDYFYWLLAGLSALNL
	Motif7	TVJVYIQDNVGWGLGFGIPAA
	Motif8	PGGSPLTRIAQVLVAAIRKRK
	Motif9	PALRSKTGGWKACPFIJGNEGFERLAYYG
	Motif10	QMSTFFVKQGTTMBRHJGSFF

## Sheet: Table S6
Table S6. Duplication events and related Ka/Ks values of pecan AMTs and NRTs.
Gene Name	Gene Name	Ka	Ks	Ka/Ks	Types of selection
CiAMT1.1	CiAMT1.4	0.171744	NaN	NaN	NA
CiAMT3.1a	CiAMT3.1b	1.02376	3.06897	0.333586	Purify selection
CiAMT3.3	CiAMT2.2	0.275041	NaN	NaN	NA
CiAMT1.3b	CiAMT1.3a	0.0397444	0.665217	0.0597465	Purify selection
CiAMT3.3	CiAMT2.1	0.272156	NaN	NaN	NA
CiNPF1.2a	CiNPF1.2b	0.3136	1.3874	0.2261	Purify selection
CiNPF1.2a	CiNPF6.2	0.7541	1.732	0.4354	Purify selection
CiNPF1.2b	CiNPF6.3a	0.7433	NaN	NaN	NA
CiNPF2.11a	CiNPF2.8b	0.5696	NaN	NaN	NA
CiNPF2.11b	CiNPF8.2a	0.6706	2.2112	0.3033	Purify selection
CiNPF2.11b	CiNPF2.11a	0.1939	1.1077	0.1751	Purify selection
CiNPF2.13	CiNPF2.11b	0.4577	2.572	0.1779	Purify selection
CiNPF2.13	CiNPF5.10a	0.7432	NaN	NaN	NA
CiNPF2.13	CiNPF5.6b	0.691	NaN	NaN	NA
CiNPF2.13	CiNPF4.5c	0.8015	NaN	NaN	NA
CiNPF2.13	CiNPF5.6e	0.7008	NaN	NaN	NA
CiNPF2.13	CiNPF7.3b	0.7825	NaN	NaN	NA
CiNPF2.13	CiNPF2.7a	0.6539	NaN	NaN	NA
CiNPF2.4	CiNRT2.1	0.0269	0.4562	0.059	Purify selection
CiNPF2.7b	CiNPF2.7a	0.1074	0.4938	0.2175	Purify selection
CiNPF2.7d	CiNPF2.7b	0.348	2.2678	0.1535	Purify selection				0
CiNPF2.7d	CiNPF2.7a	0.3495	2.5838	0.1353	Purify selection
CiNPF2.8a	CiNPF2.7b	0.842	NaN	NaN	NA
CiNPF2.8a	CiNPF2.7a	0.823	NaN	NaN	NA
CiNPF2.8a	CiNPF8.2c	0.7543	NaN	NaN	NA
CiNPF4.3a	CiNPF4.3b	0.0715	0.3735	0.1913	Purify selection
CiNPF4.3a	CiNPF8.3a	0.6556	NaN	NaN	NA
CiNPF4.3a	CiNPF7.3b	0.7958	NaN	NaN	NA
CiNPF4.3a	CiNPF8.2a	0.6563	NaN	NaN	NA
CiNPF4.4	CiNPF4.6	0.6169	2.7806	0.2219	Purify selection
CiNPF4.4	CiNPF8.3d	0.7065	NaN	NaN	NA
CiNPF4.4	CiNPF8.3a	0.6915	NaN	NaN	NA
CiNPF4.4	CiNPF6.1	0.8214	2.9544	0.278	Purify selection
CiNPF4.5b	CiNPF5.2d	0.1521	0.6905	0.2203	Purify selection
CiNPF4.5c	CiNPF5.4b	0.7539	NaN	NaN	NA
CiNPF4.5c	CiNPF7.1b	0.7568	NaN	NaN	NA
CiNPF4.6	CiNPF4.7	0.1915	1.5405	0.1243	Purify selection
CiNPF4.6	CiNPF3.1a	0.6277	2.9252	0.2146	Purify selection
CiNPF4.6	CiNPF4.5a	2.393	2.612	0.9162	Purify selection
CiNPF4.6	CiNPF2.8a	0.842	NaN	NaN	NA
CiNPF4.6	CiNPF7.3c	0.7515	NaN	NaN	NA
CiNPF5.10a	CiNPF5.10c	0.1723	0.707	0.2438	Purify selection
CiNPF5.10a	CiNPF8.2c	0.5974	2.7477	0.2174	Purify selection
CiNPF5.10a	CiNPF5.10b	0.1981	0.576	0.3439	Purify selection
CiNPF5.1a	CiNPF5.1b	0.0581	0.4168	0.1395	Purify selection
CiNPF5.1a	CiNPF5.6b	0.6311	NaN	NaN	NA
CiNPF5.1b	CiNPF2.7a	0.804	NaN	NaN	NA
CiNPF5.2a	CiNPF5.2b	0.0813	0.6381	0.1275	Purify selection
CiNPF5.2a	CiNPF5.2c	0.2325	2.8217	0.0824	Purify selection
CiNPF5.2b	CiNPF5.2c	0.2324	2.4472	0.095	Purify selection
CiNPF5.2b	CiNPF4.5e	0.0117	0.0454	0.2569	Purify selection
CiNPF5.4a	CiNPF5.4c	0.1084	0.5394	0.201	Purify selection
CiNPF5.4a	CiNPF7.1a	0.2673	1.0007	0.2671	Purify selection
CiNPF5.4c	CiNPF7.1b	0.7406	NaN	NaN	NA
CiNPF5.5	CiNPF8.2c	0.9819	3.0225	0.3249	Purify selection
CiNPF5.6a	CiNPF5.6b	0.262	1.8836	0.1391	Purify selection
CiNPF5.6a	CiNPF5.6e	0.2435	2.1689	0.1123	Purify selection
CiNPF5.6b	CiNPF5.6e	0.0857	0.452	0.1897	Purify selection
CiNPF5.6b	CiNPF5.5	0.9369	2.4454	0.3831	Purify selection
CiNPF5.6b	CiNPF5.6c	0.0214	0.0582	0.3666	Purify selection
CiNPF5.6e	CiNPF2.7a	0.7715	NaN	NaN	NA
CiNPF5.6e	CiNPF4.7	0.7271	NaN	NaN	NA
CiNPF5.6e	CiNPF8.2c	0.6064	NaN	NaN	NA
CiNPF5.9a	CiNPF5.9b	0.076	0.418	0.1819	Purify selection
CiNPF5.9a	CiNPF7.3a	0.7979	NaN	NaN	NA
CiNPF5.9b	CiNPF1.2b	0.859	2.7059	0.3174	Purify selection
CiNPF5.9b	CiNPF2.13	0.8398	NaN	NaN	NA
CiNPF5.9b	CiNPF6.1	0.9015	NaN	NaN	NA
CiNPF5.9b	CiNPF8.3d	0.6723	NaN	NaN	NA
CiNPF5.9b	CiNPF2.8a	0.9176	NaN	NaN	NA
CiNPF5.9b	CiNPF5.6e	0.6517	3.2378	0.2013	Purify selection
CiNPF5.9b	CiNPF7.3a	0.8007	NaN	NaN	NA
CiNPF5.9b	CiNPF7.3b	0.7813	NaN	NaN	NA
CiNPF5.9b	CiNPF6.3b	0.7639	NaN	NaN	NA
CiNPF5.9b	CiNPF7.3c	0.7828	NaN	NaN	NA
CiNPF5.9b	CiNPF8.2a	0.6945	NaN	NaN	NA
CiNPF5.9b	CiNPF5.2d	0.852	NaN	NaN	NA
CiNPF6.1	CiNPF2.13	0.8491	NaN	NaN	NA
CiNPF6.1	CiNPF5.10a	0.8934	NaN	NaN	NA
CiNPF6.1	CiNPF4.7	0.8746	NaN	NaN	NA
CiNPF6.1	CiNPF8.3a	0.7862	NaN	NaN	NA
CiNPF6.1	CiNPF8.2a	0.653	NaN	NaN	NA
CiNPF6.2	CiNPF2.13	0.6922	NaN	NaN	NA
CiNPF6.2	CiNPF2.7a	0.7207	2.0294	0.3551	Purify selection
CiNPF6.2	CiNPF5.9b	0.7811	NaN	NaN	NA
CiNPF6.2	CiNPF5.6e	0.6902	2.2259	0.3101	Purify selection
CiNPF6.2	CiNPF4.6	0.5971	3.0387	0.1965	Purify selection
CiNPF6.2	CiNPF6.1	0.7444	NaN	NaN	NA
CiNPF6.2	CiNPF8.3d	0.5798	NaN	NaN	NA
CiNPF6.2	CiNPF2.8a	0.7708	NaN	NaN	NA
CiNPF6.2	CiNPF8.2a	0.5918	NaN	NaN	NA
CiNPF6.3a	CiNPF6.3b	0.075	0.3817	0.1966	Purify selection
CiNPF6.4	CiNPF6.2	0.4609	NaN	NaN	NA
CiNPF6.4	CiNPF7.3a	0.6938	NaN	NaN	NA
CiNPF7.3a	CiNPF7.3b	0.0524	0.2962	0.177	Purify selection
CiNPF7.3a	CiNPF7.3c	0.1679	1.3638	0.1231	Purify selection
CiNPF7.3a	CiNPF7.3d	0.1756	1.2406	0.1416	Purify selection
CiNPF7.3b	CiNPF7.3c	0.1713	1.6228	0.1056	Purify selection
CiNPF7.3b	CiNPF7.3d	0.1677	1.3455	0.1246	Purify selection
CiNPF7.3c	CiNPF7.3d	0.0608	0.3318	0.1832	Purify selection
CiNPF7.3c	CiNPF4.5a	2.4859	2.7519	0.9034	Purify selection
CiNPF7.3d	CiNPF7.2	0.0105	0.0319	0.3274	Purify selection
CiNPF8.1	CiNPF8.2c	0.1572	1.5177	0.1036	Purify selection
CiNPF8.2c	CiNPF2.7a	0.7397	2.569	0.2879	Purify selection
CiNPF8.3a	CiNPF7.3c	0.5629	3.1854	0.1767	Purify selection
CiNPF8.3a	CiNPF8.3b	0.0245	0.094	0.261	Purify selection
CiNPF8.3b	CiNPF8.3c	0.016	0.1021	0.1569	Purify selection
CiNRT3.1	CiNRT3.2	0.2595	0.6519	0.3981	Purify selection
